# Supplementary material for: Identification of Parkinson’s disease PACE subtypes and repurposing treatments through integrative analyses of multimodal data
Source: PubMed Central journal article supplement (PMC11233682; doi:10.1038/s41746-024-01175-9), 2024-07-09
Supplement: 41746_2024_1175_MOESM1_ESM.pdf [file 41746_2024_1175_MOESM1_ESM.pdf]

**Supplement to:** Identification of Parkinson's disease PACE subtypes and repurposing treatments through integrative analyses of multimodal data

## **Supplementary Note 1. Determination of optimal cluster number**

### **A. Subtype identification in the PPMI (development) cohort**

Using learned representation vectors of participants in the PPMI cohort, dendrogram showed that the 3-cluster model is the optimal fit of the agglomerative hierarchical clustering model (see Supplementary Figure 1). In addition, out of 18 indices in 'NbClust', 8 suggested 3 clusters, 1 suggested 1 cluster, 4 suggested 2 clusters, 3 suggested 4 clusters, and 2 suggested >7 clusters. In conclusion, by considering both dendrogram and the indices, the optimal cluster number was 3.

### **B. Subtype identification in the PDBP (validation) cohort**

In the PDBP validation cohort, dendrogram also showed that the 3-cluster model is the optimal fit of the agglomerative hierarchical clustering model (see Supplementary Figure 2). In addition, out of 18 indices in 'NbClust', 5 suggested 3 clusters, 1 suggested 1 cluster, 5 suggested 2 clusters, and 5 suggested 4 clusters, and 1 suggested 8 clusters. In conclusion, by considering both dendrogram and the indices, the optimal cluster number was 3.

## Supplementary Figures

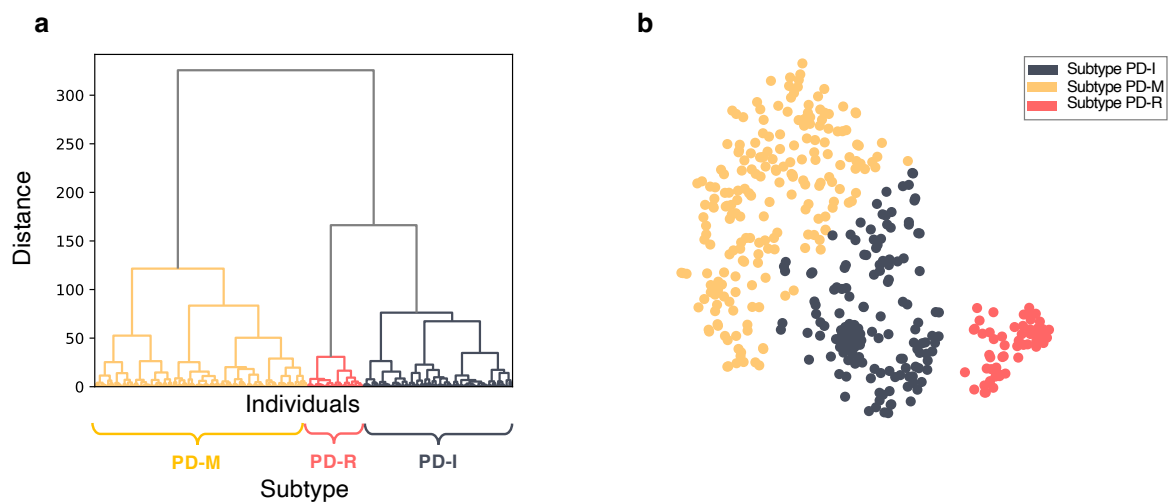

**Supplementary Figure 1. Performance of hierarchical clustering in the PPMI cohort. a.** Dendrogram of hierarchical clustering shows clear three cluster structure of PDs in PPMI data. **b.** t-Stochastic Neighbor Embedding (t-SNE) visualization of shows clear three cluster structure of PDs in PPMI data.

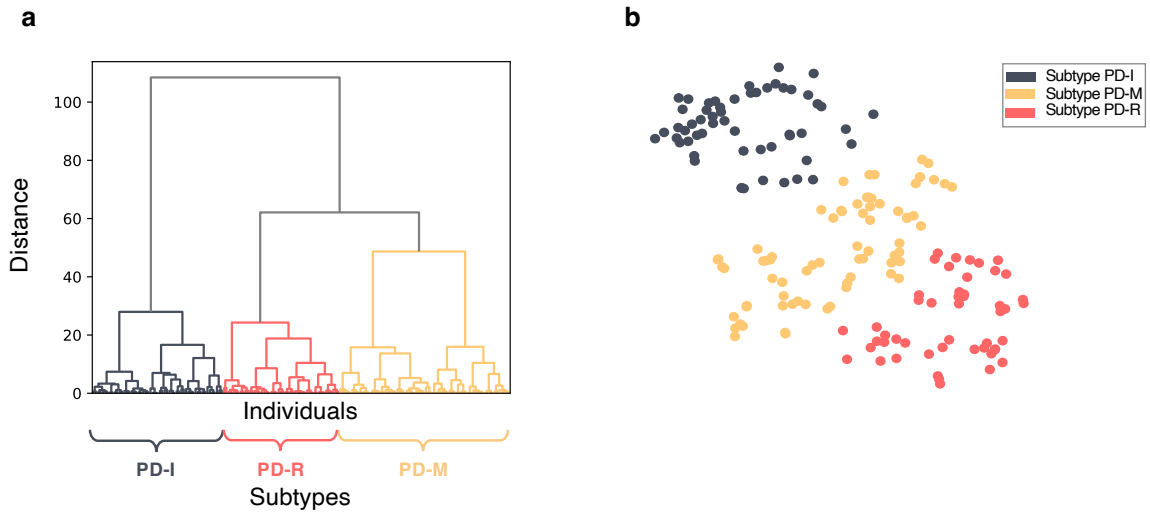

**Supplementary Figure 2. Performance of hierarchical clustering in the PDBP cohort. a.** Dendrogram of hierarchical clustering shows clear three cluster structure of PDs in the PDBP data. **b.** t-SNE visualization of shows clear three cluster structure of PDs in the PDBP data.

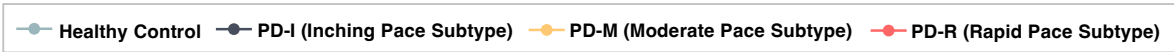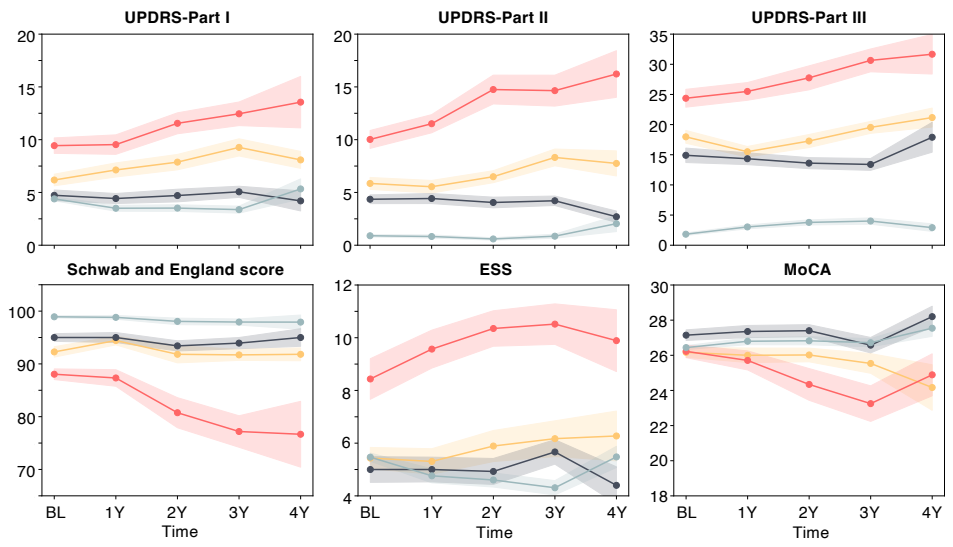

**Supplementary Figure 3. Averaged symptom progression trajectories by PD subtypes in the PDBP cohort.** PD symptom progression profiles of these re-identified subtypes closely mirrored those uncovered in our primary analysis within the PPMI cohort.

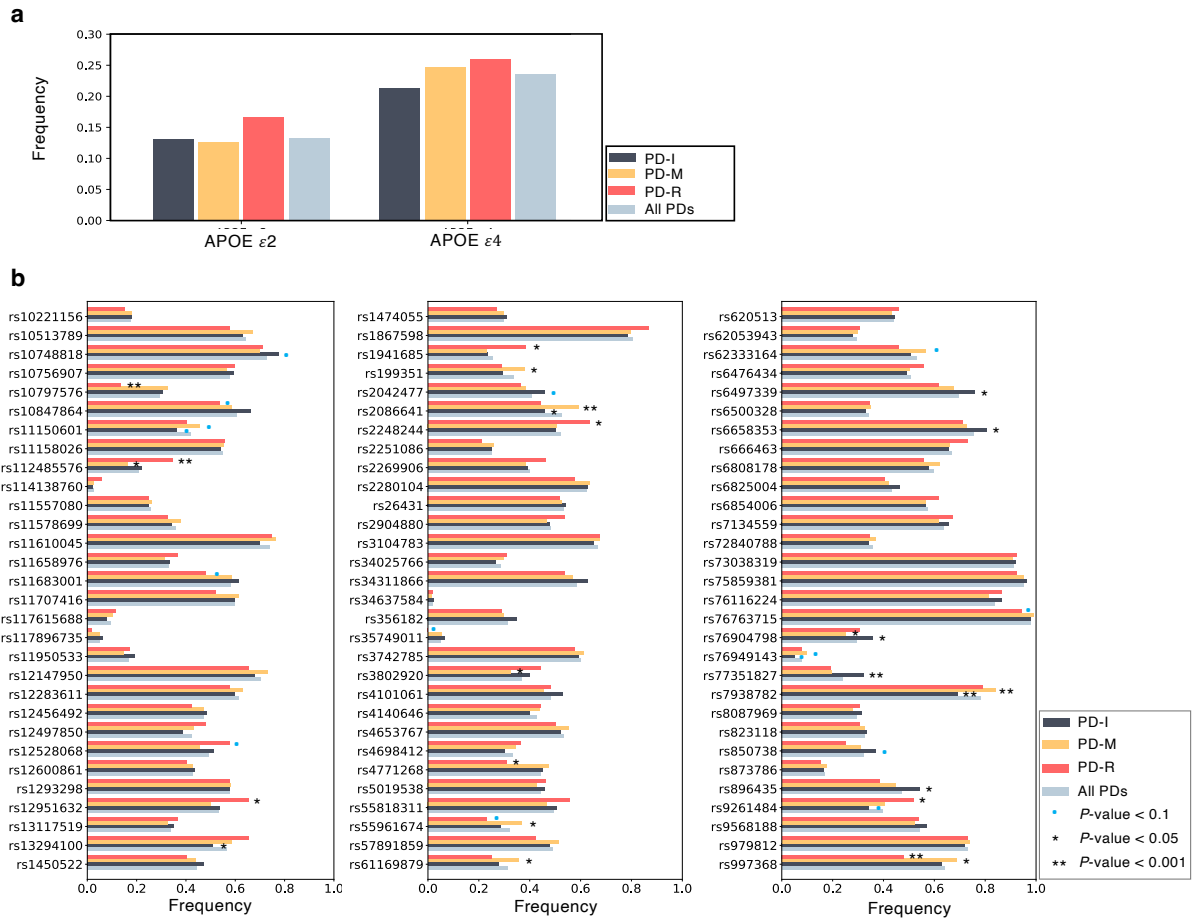

**Supplementary Figure 4. Results of genetic analysis across subtypes.** Enrichment analysis didn't find difference in APOE  $\epsilon 2$  and  $\epsilon 4$  alleles, GBA and LRRK2 variants among identified PD subtypes (a). Signals in 90 PD-related SNPs were found to be associated with the identified PD subtypes (b).

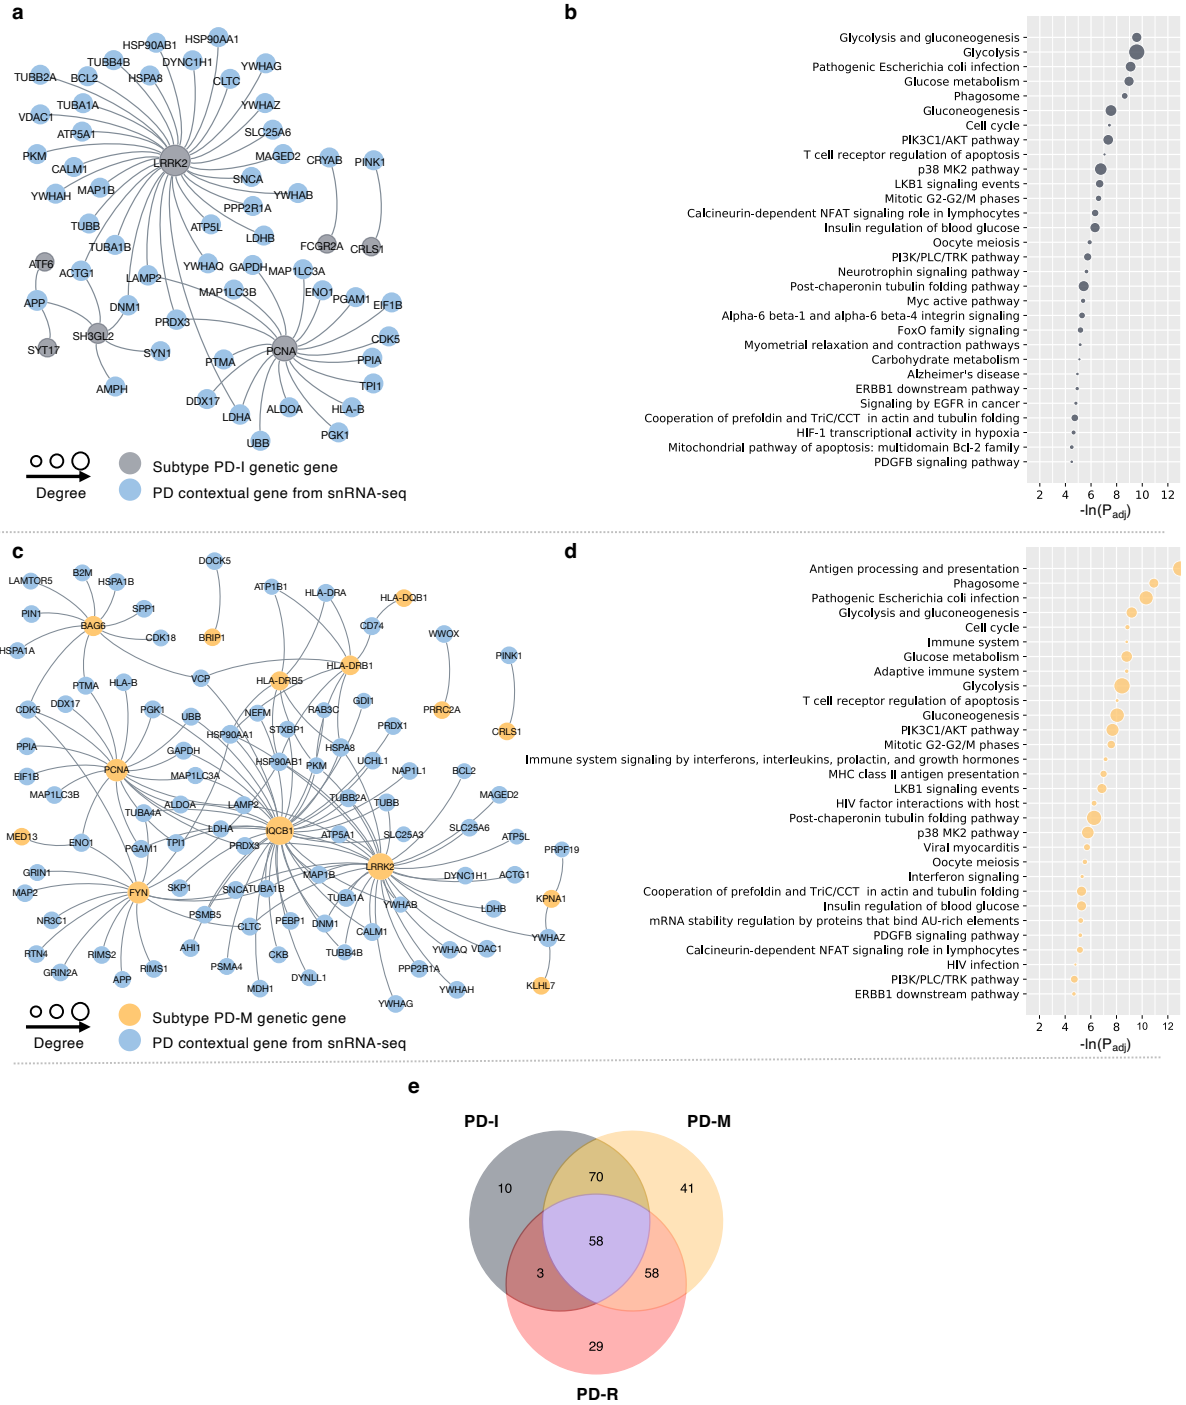

**Supplementary Figure 5. Genetic molecular modules of the subtypes. a. and b.** Genetic molecular module and pathways enriched based on genetic molecular module of the PD-I subtype. **c. and d.** Genetic molecular module and pathways enriched based on genetic molecular module of PD-M. **e.** Venn plot showing overlaps of enriched pathways among the three subtypes.

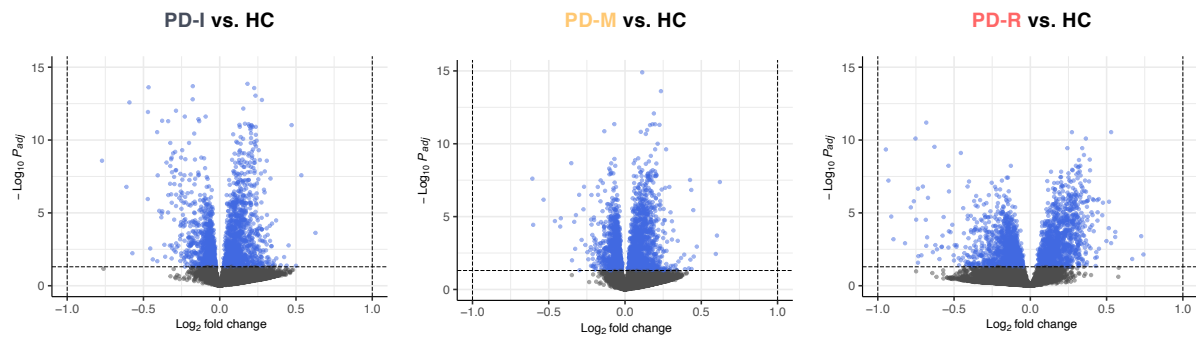

**Supplementary Figure 6. Volcano plots for differential gene expression analysis.** Genes with adjusted  $P$  value (i.e.,  $Q$  value)  $< 0.05$  were considered as differentially expressed genes (DEGs) in each subtype (subtype vs. healthy controls [HCs]), which were further fed to the GPSnet algorithm for identifying gene modules of each of the identified PD subtypes.



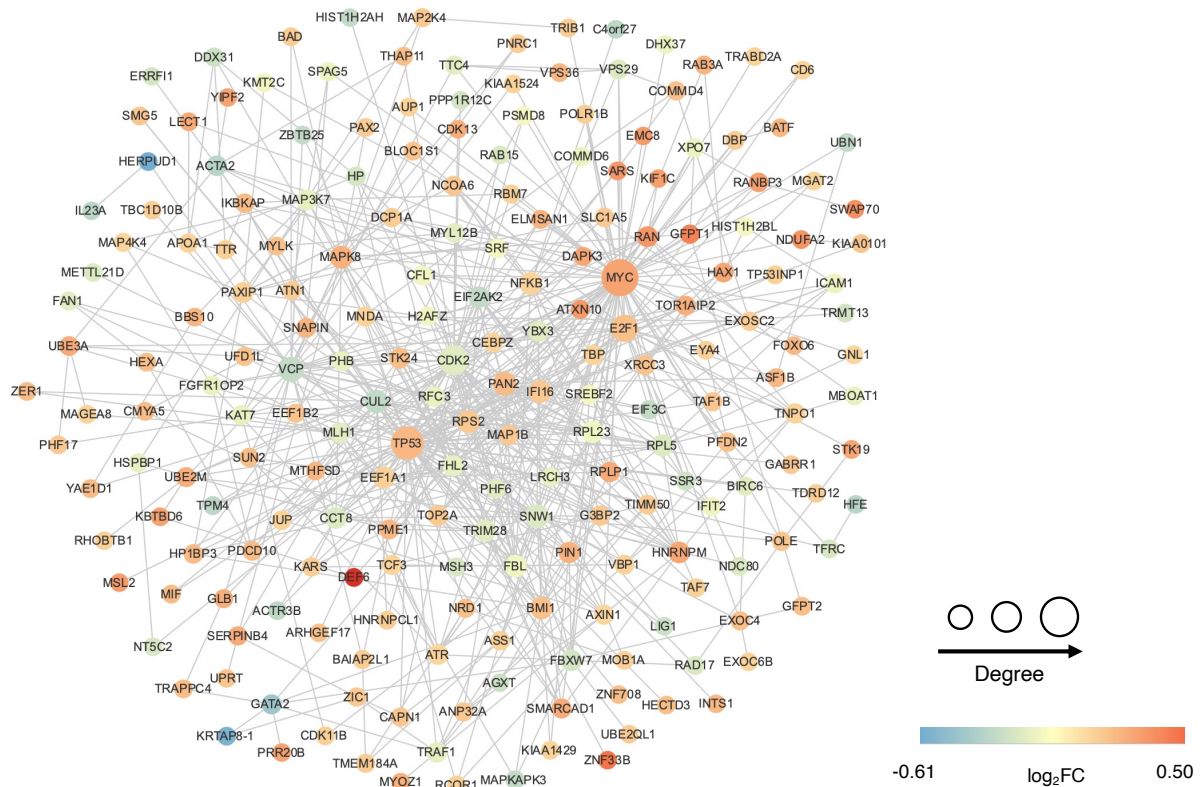

**Supplementary Figure 7. Transcriptomic molecular module of the PD-I subtype identified based on gene expression profiles with network-based method, GPSnet.** Color indicates log fold change in gene expression, PD-I vs. healthy control. Size of a gene indicates degree (number of connected genes) of the gene in the protein-protein interaction network.

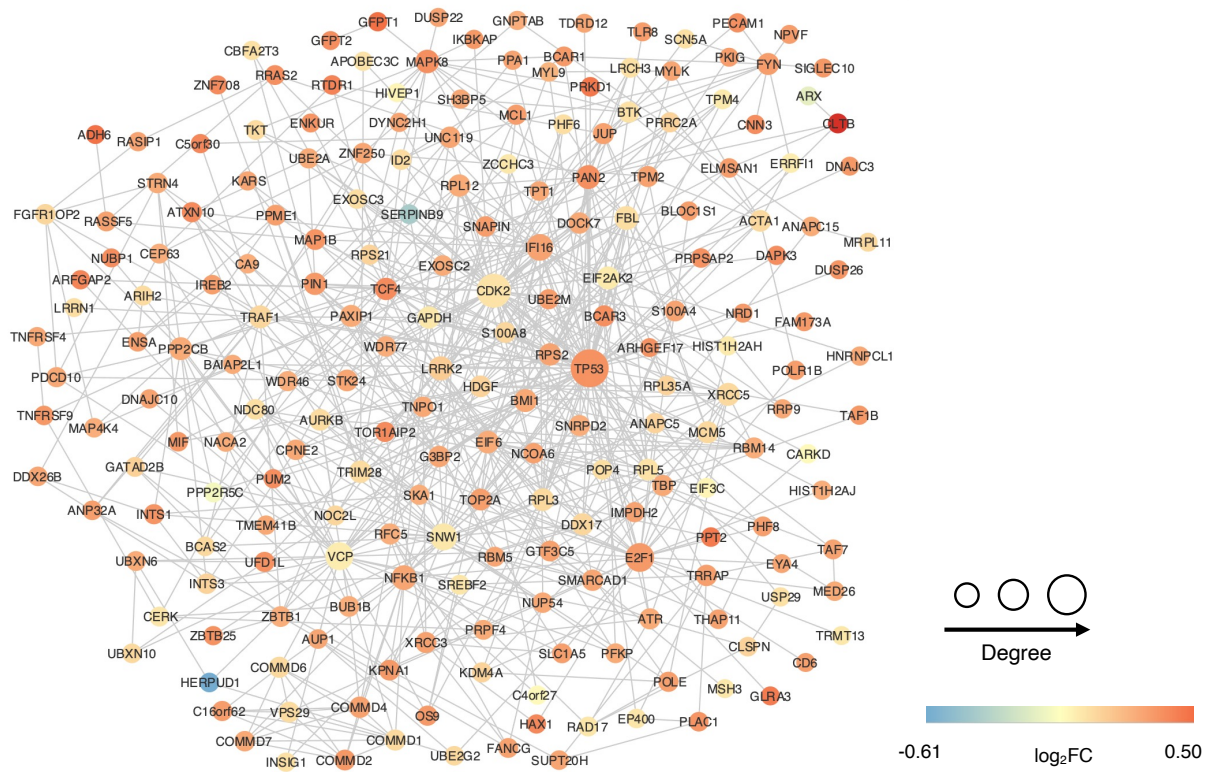

**Supplementary Figure 8. Transcriptomic molecular module of the PD-M subtype identified based on gene expression profiles with network-based method, GPSnet.** Color indicates log fold change in gene expression, PD-M vs. healthy control. Size of a gene indicates degree (number of connected genes) of the gene in the protein-protein interaction network.

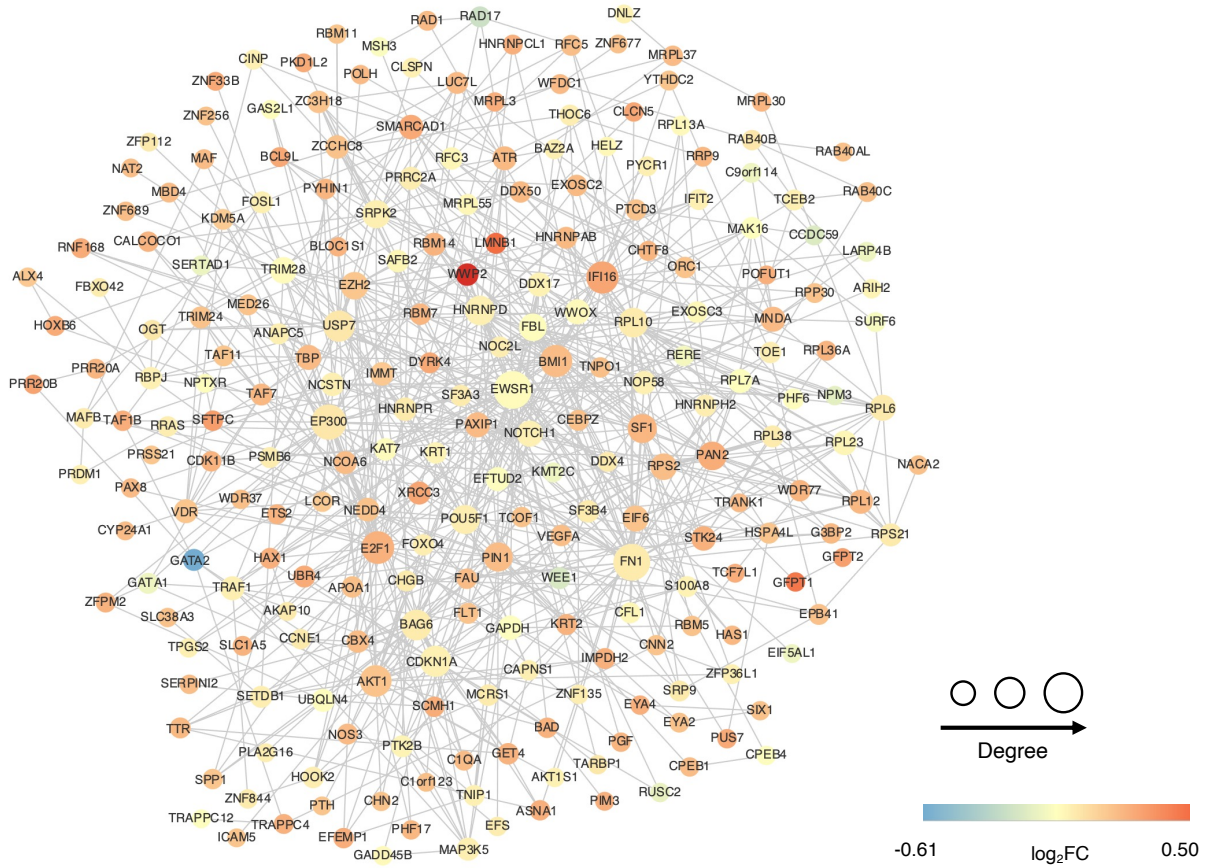

**Supplementary Figure 9. Transcriptomic molecular module of the PD-R subtype identified based on gene expression profiles with network-based method, GPSnet.** Color indicates log fold change in gene expression, PD-R vs. healthy control. Size of a gene indicates degree (number of connected genes) of the gene in the protein-protein interaction network.

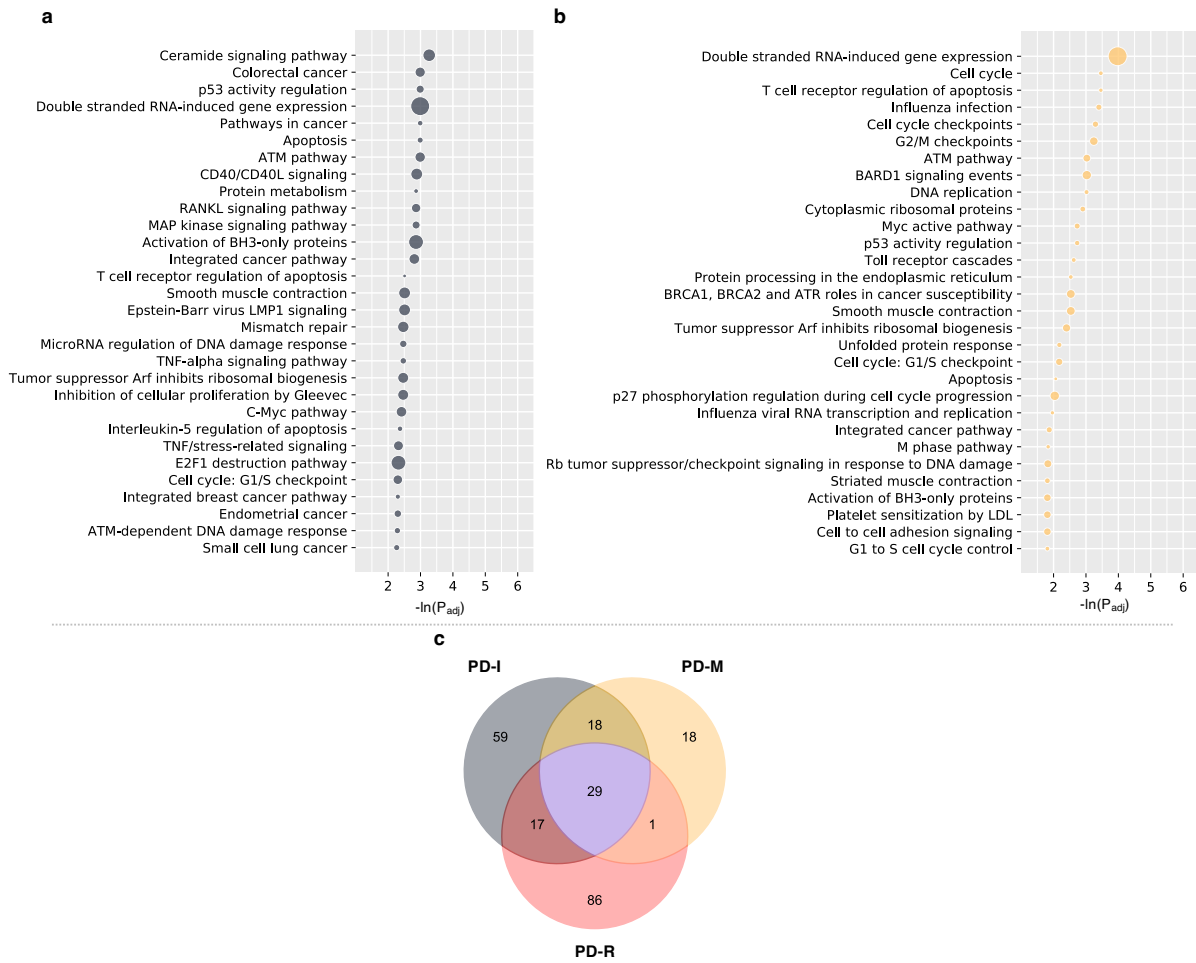

**Supplementary Figure 10. Enriched pathways based on transcriptomic molecular module of the subtypes. a. and b.** Enriched pathways based on transcriptomic molecular module of the PD-I and PD-M subtypes, respectively. **c.** Venn plot showing overlaps of enriched pathways among the three subtypes.

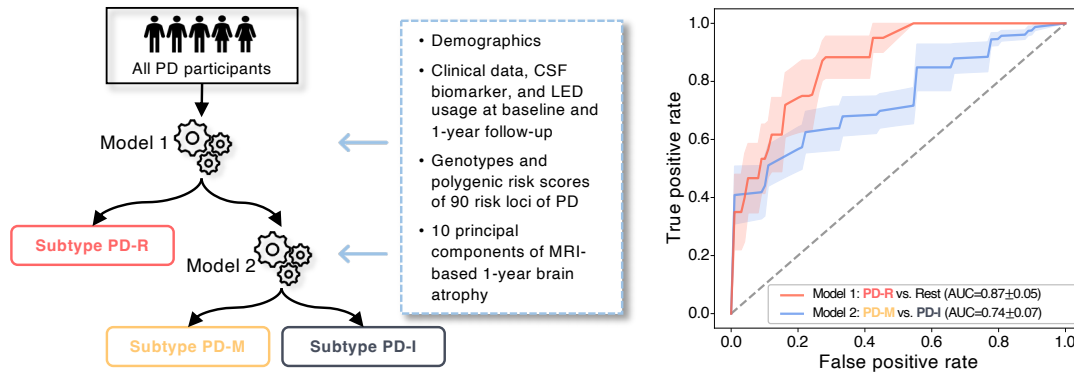

**Supplementary Figure 11. Classification model for separating the PD subtypes at early stage.** Specifically, we leveraged a cascade framework consisting of two base random forest classifiers: one separating PD-R from the others and another distinguishing PD-I and PD-M. Demographics, genetic profiles, as well as clinical and MRI information within the first year after baseline were used as features to train the model.

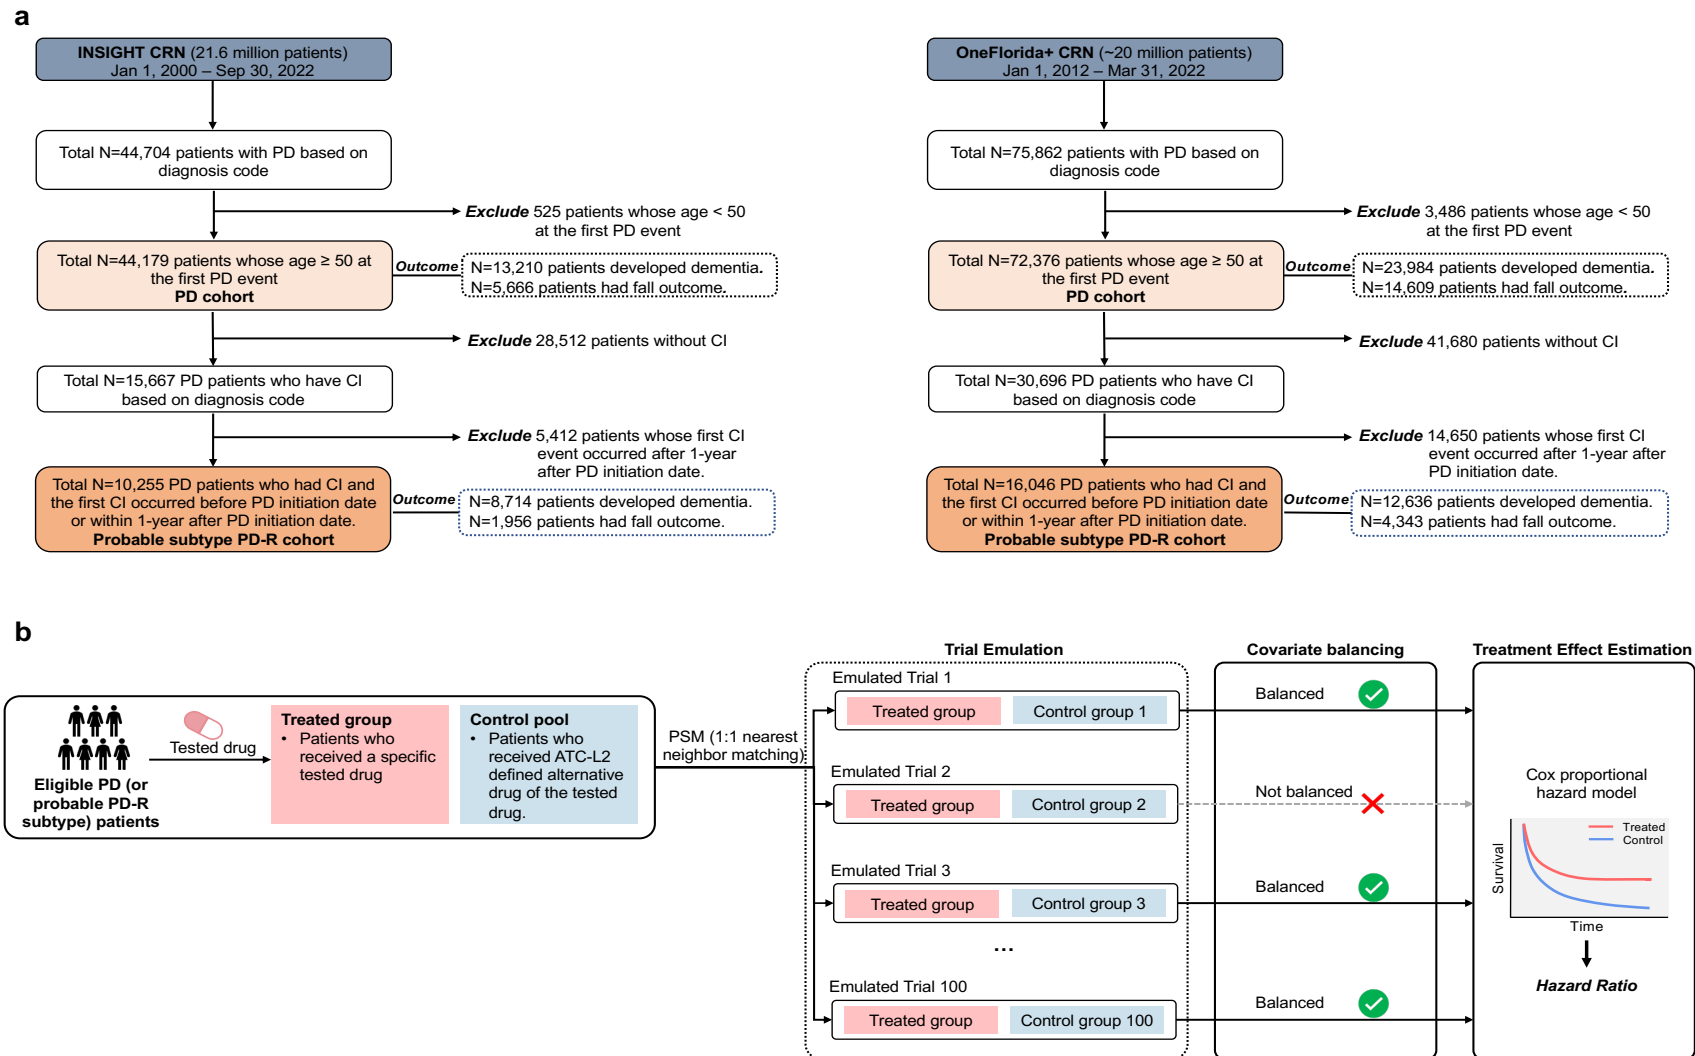

**Supplementary Figure 12. Study design of real-world patient data analysis for drug treatment effects estimation. a.** Inclusion exclusion criteria. Within each database, we constructed a PD cohort and a probable subtype PD-R cohort as the PD patients who had cognitive impairment (CI) no later than 1 year after 1<sup>st</sup> PD diagnosis. **b.** Study pipeline of trial emulation based on real-world patient data.

## Supplementary Tables

**Supplementary Table 1. Characteristics and utilization of the studied cohorts**

| Variables                                                                                                                                                                                                                                                                                         | Development cohort: PPMI |           |                        | Validation cohort: PDBP |                         |                       |
|---------------------------------------------------------------------------------------------------------------------------------------------------------------------------------------------------------------------------------------------------------------------------------------------------|--------------------------|-----------|------------------------|-------------------------|-------------------------|-----------------------|
|                                                                                                                                                                                                                                                                                                   | HCs                      | SWEDD     | PDs ( <i>de novo</i> ) | HCs                     | Early PDs               | Other PDs             |
| # of participants                                                                                                                                                                                                                                                                                 | 188                      | 61        | 406                    | 211                     | 210                     | 287                   |
| Demographics                                                                                                                                                                                                                                                                                      |                          |           |                        |                         |                         |                       |
| Age at onset, year, mean (SD)                                                                                                                                                                                                                                                                     | -                        | -         | 59.6 (10.0)            | -                       | 63.0 (10.0)             | 57.6 (10.5)           |
| Sex male, N (%)                                                                                                                                                                                                                                                                                   | 121 (64.4)               | 38 (62.3) | 266 (65.5)             | 100 (47.4)              | 120 (57.1) <sup>a</sup> | 182 (63.4)            |
| Race white, N (%)                                                                                                                                                                                                                                                                                 | 177 (94.1)               | 58 (95.1) | 384 (94.6)             | 196 (92.9)              | 199 (94.8)              | 261 (90.9)            |
| Symptom duration at baseline, year (SD)                                                                                                                                                                                                                                                           | -                        | -         | 0.6 (0.7)              | -                       | 1.0 (0.8)               | 8 (6.8)               |
| Family history (%)                                                                                                                                                                                                                                                                                | 6 (3.2)                  | 15 (24.6) | 61 (15)                | 7 (3.3)                 | 28 (13.3)               | 21 (7.3) <sup>b</sup> |
| Education history (%)                                                                                                                                                                                                                                                                             |                          |           |                        |                         |                         |                       |
| < 12 years                                                                                                                                                                                                                                                                                        | 5 (2.7)                  | 10 (16.4) | 26 (6.4)               | 2 (0.9)                 | 7 (3.3)                 | 4 (1.4) <sup>c</sup>  |
| 12-16 years                                                                                                                                                                                                                                                                                       | 110 (58.5)               | 34 (55.7) | 248 (61.1)             | 141 (66.8)              | 131 (62.4)              | 169 (58.9)            |
| ≥ 16 years                                                                                                                                                                                                                                                                                        | 73 (38.8)                | 17 (27.9) | 132 (32.5)             | 68 (32.2)               | 71 (33.8)               | 113 (39.4)            |
| Utilization                                                                                                                                                                                                                                                                                       |                          |           |                        |                         |                         |                       |
| Training deep progression embedding model                                                                                                                                                                                                                                                         | ✓                        | ✓         | ✓                      | ✓                       | ✓                       | ✓                     |
| Clustering analysis for subtype identification                                                                                                                                                                                                                                                    |                          |           | ✓                      |                         | ✓                       |                       |
| <sup>a</sup> Distribution of sex, PPMI PDs vs. PDBP early PDs, P value < 0.05<br><sup>b</sup> Distribution of symptom duration at baseline, PPMI PDs vs. PDBP other PDs, P value < 0.01<br><sup>c</sup> Distribution of education history at baseline, PMI PDs vs. PDBP other PDs, P value < 0.05 |                          |           |                        |                         |                         |                       |
| HC = Healthy controls; PD = Parkinson's disease; PDBP = Parkinson's Disease Biomarkers Program; PPMI = the Parkinson progression marker initiative; SD = standard deviation; SWEDD = subjects with scans without evidence for dopaminergic deficit.                                               |                          |           |                        |                         |                         |                       |

**Supplementary Table 2. Clinical variables used for PD subtyping**

| Category                  | Data                                                                                                                    | Description                                                                                                                                                                                         | PPMI | PDBP |
|---------------------------|-------------------------------------------------------------------------------------------------------------------------|-----------------------------------------------------------------------------------------------------------------------------------------------------------------------------------------------------|------|------|
| Motor assessment          | MDS-UPDRS Part II <sup>1</sup>                                                                                          | Self-administered questionnaire of motor experiences of daily living. We used all items.                                                                                                            | X    | X    |
|                           | MDS-UPDRS Part III <sup>1</sup>                                                                                         | Motor examination provided by rater. We used all items with medication “OFF”.                                                                                                                       | X    | X    |
|                           | Schwab-England activities of daily living score                                                                         | Measure of the abilities of individuals living with PD relative to a completely independent situation.                                                                                              | X    | X    |
| Non-motor assessment      | MDS-UPDRS Part I <sup>1</sup>                                                                                           | Non-motor experiences of daily living. We used all items.                                                                                                                                           | X    | X    |
|                           | Scales for Outcomes in Parkinson’s disease-Autonomic (SCOPA-AUT) <sup>2</sup>                                           | The SCOPA-AUT was developed to evaluate autonomic symptoms. We used scores of the 7 domains, including gastrointestinal, urinary, cardiovascular, thermoregulatory, pupillomotor, and sexual.       | X    |      |
|                           | Geriatric depression scale (GDS) <sup>3</sup>                                                                           | Measure of depression in older adults.                                                                                                                                                              | X    |      |
|                           | Questionnaire for Impulsive-Compulsive Disorders in Parkinson’s disease (QUIP) <sup>4</sup>                             | Measure of severity of symptoms and support a diagnosis of impulse control disorders and related disorders in PD. We used all items.                                                                | X    |      |
|                           | State-Trait Anxiety Inventory (STAI) <sup>5</sup>                                                                       | The measure of trait and state anxiety. We used the STAI-Strait and STAI-State sub-scores.                                                                                                          | X    |      |
|                           | Benton Judgment of Line Orientation (JOLO) <sup>6</sup>                                                                 | A standardized measure of visuospatial judgment. We used the crude score and MOANS normative scores.                                                                                                | X    |      |
|                           | Hopkins Verbal Learning Test (HVL) <sup>7</sup>                                                                         | A memory test with six equivalent forms.                                                                                                                                                            | X    |      |
|                           | Letter-number sequencing (LNS)                                                                                          | A subset of Wechsler adult intelligence scale, measuring working memory, attention, mental control                                                                                                  | X    |      |
|                           | Montreal Cognitive Assessment (MoCA) <sup>8</sup>                                                                       | A screening assessment for detecting cognitive impairment. We used the visuospatial, naming, attention, language, delayed recall, abstraction, and verbal fluency sub-scores, and total MoCA score. | X    | X    |
|                           | Semantic verbal-language fluency test <sup>9</sup>                                                                      | Assessment of semantic knowledge, retrieval ability, and executive functioning. We used the sub-scores in terms of animals, vegetables, and fruits.                                                 | X    |      |
|                           | Symbol-Digit Matching (SDM) <sup>10</sup>                                                                               | A neuropsychological test that examines a person’s attention and speed of processing.                                                                                                               | X    |      |
|                           | Epworth Sleepiness Score (ESS) <sup>11</sup>                                                                            | Measure of daytime sleepiness. We used all items.                                                                                                                                                   | X    | X    |
|                           | REM sleep behaviour disorder (RBD) <sup>12</sup>                                                                        | A questionnaire for RBD. We used all items.                                                                                                                                                         | X    | X    |
| Cranial Nerve Examination | A kind of neurological examination that is used to identify problems with the cranial nerves. We used the 9 components. | X                                                                                                                                                                                                   |      |      |
| PD medication             | Levodopa equivalent daily dose                                                                                          | Levodopa equivalent daily dose                                                                                                                                                                      | X    |      |

Abbreviations: MDS-UPDRS = Movement Disorders Society–revised Unified Parkinson’s Disease Rating Scale.



**Supplementary Table 3. 2-year follow-up clinical characteristics by subtypes in the PPMI cohort**

| Variables                                   | Subtype PD-I<br>(Inching Pace) | Subtype PD-M<br>(Moderate Pace) | Subtype PD-R<br>(Rapid Pace) | P-value <sup>a</sup> | Post-hoc <sup>b</sup> | P-value<br>adjusted <sup>c</sup> |
|---------------------------------------------|--------------------------------|---------------------------------|------------------------------|----------------------|-----------------------|----------------------------------|
| # of participants                           | 145                            | 207                             | 54                           | -                    | -                     | -                                |
| <b>Motor manifestations</b>                 |                                |                                 |                              |                      |                       |                                  |
| MDS-UPDRS Part II, mean (SD)                | 6.0 (4.6)                      | 8.2 (4.9)                       | 12.1 (6.0)                   | <0.001***            | All comparisons       | <0.001***                        |
| MDS-UPDRS Part III, mean (SD)               | 23.9 (10.6)                    | 27.1 (10.5)                     | 33.4 (13.1)                  | <0.001***            | All comparisons       | <0.001**                         |
| H&Y Stage, mean (SD)                        | 1.7 (0.6)                      | 1.8 (0.5)                       | 2.1 (0.6)                    | <0.001**             | III vs. rest          | 0.028*                           |
| Schwab and England score, mean (SD)         | 90.6 (7.2)                     | 89.0 (7.5)                      | 83.5 (9.7)                   | <0.001***            | III vs. rest          | <0.001***                        |
| Tremor score, mean (SD)                     | 0.5 (0.4)                      | 0.6 (0.4)                       | 0.6 (0.5)                    | 0.006*               | I vs. II              | 0.030*                           |
| PIGD score, mean (SD)                       | 0.3 (0.3)                      | 0.3 (0.3)                       | 0.7 (0.6)                    | <0.001***            | III vs. rest          | <0.001***                        |
| Motor phenotype, N (%)                      |                                |                                 |                              |                      |                       |                                  |
| Tremor                                      | 73 (50.3)                      | 127 (61.4)                      | 18 (33.3)                    | <0.001***            | -                     | -                                |
| Indeterminate                               | 30 (20.7)                      | 48 (23.2)                       | 13 (24.1)                    |                      |                       |                                  |
| PIGD                                        | 29 (20.0)                      | 32 (15.5)                       | 23 (42.6)                    |                      |                       |                                  |
| <b>Non-motor manifestations</b>             |                                |                                 |                              |                      |                       |                                  |
| MDS-UPDRS Part I, mean (SD)                 | 6.8 (4.3)                      | 7.4 (5.1)                       | 10.7 (5.4)                   | <0.001***            | III vs. rest          | <0.001***                        |
| Hallucination, mean (SD)                    | 0.09 (0.32)                    | 0.05 (0.21)                     | 0.24 (0.62)                  | 0.002**              | III vs. rest          | 0.001**                          |
| Apathy, mean (SD)                           | 0.3 (0.7)                      | 0.4 (0.7)                       | 0.6 (0.9)                    | 0.088                | -                     | 0.205                            |
| Pain, mean (SD)                             | 0.8 (0.8)                      | 0.9 (0.9)                       | 1.1 (1.0)                    | 0.076                | -                     | 0.016*                           |
| Fatigue, mean (SD)                          | 0.6 (0.7)                      | 0.8 (0.9)                       | 1.2 (1.1)                    | <0.001***            | III vs. rest          | <0.001**                         |
| Sleep, mean (SD)                            |                                |                                 |                              |                      |                       |                                  |
| Epworth sleepiness score                    | 5.1 (3.4)                      | 7.3 (4.1)                       | 8.5 (4.8)                    | <0.001***            | I vs. rest            | <0.001**                         |
| REM sleep behavior disorder                 | 3.9 (2.8)                      | 4.7 (3.0)                       | 5.4 (3.4)                    | 0.006*               | I vs. III             | 0.007*                           |
| Sleep phenotype, missing = 1, N (%)         |                                |                                 |                              |                      |                       |                                  |
| REM sleep behavior disorder positive        | 45 (31.0)                      | 92 (44.7)                       | 30 (55.6)                    | 0.002**              | -                     | -                                |
| REM sleep behavior disorder negative        | 100 (69.0)                     | 114 (55.3)                      | 24 (44.4)                    |                      |                       |                                  |
| QUIP (Impulse control disorders), mean (SD) | 0.3 (0.7)                      | 0.3 (0.7)                       | 0.3 (0.8)                    | 0.830                | -                     | 0.929                            |
| Geriatric depression scale, mean (SD)       | 2.3 (2.8)                      | 2.7 (3.0)                       | 3.4 (2.6)                    | 0.064                | -                     | 0.052                            |
| Depression phenotype, missing = 1, N (%)    |                                |                                 |                              |                      |                       |                                  |
| Normal                                      | 122 (84.1)                     | 172 (83.5)                      | 38 (70.4)                    | 0.121                | -                     | -                                |
| Mild                                        | 12 (8.3)                       | 20 (9.7)                        | 10 (18.5)                    |                      |                       |                                  |
| Moderate                                    | 6 (4.1)                        | 11 (5.3)                        | 6 (11.1)                     |                      |                       |                                  |
| Severe                                      | 5 (3.5)                        | 3 (1.5)                         | 0 (0)                        |                      |                       |                                  |
| State trait anxiety index, mean (SD)        |                                |                                 |                              |                      |                       |                                  |

|                                          |             |             |             |           |                 |           |
|------------------------------------------|-------------|-------------|-------------|-----------|-----------------|-----------|
| State subscore                           | 31.7 (10.4) | 32.2 (9.3)  | 36.3 (11.6) | 0.016*    | III vs. rest    | 0.007*    |
| Trait subscore                           | 31.7 (10.3) | 32.5 (8.8)  | 35.3 (10.3) | 0.075     | -               | 0.012*    |
| SCOPA autonomic questionnaire, mean (SD) |             |             |             |           |                 |           |
| Gastrointestinal (up+down)               | 2.6 (2.3)   | 2.8 (2.3)   | 4.3 (2.6)   | <0.001*** | III vs. rest    | <0.001*** |
| Urinary                                  | 4.0 (2.5)   | 4.7 (2.9)   | 6.5 (7.6)   | <0.001**  | III vs. rest    | 0.016*    |
| Cardiovascular                           | 0.6 (0.8)   | 0.7 (1.1)   | 0.9 (1.2)   | 0.083     | -               | 0.128     |
| Thermoregulatory                         | 0.4 (0.8)   | 0.6 (1.0)   | 0.4 (0.7)   | 0.280     | -               | 0.208     |
| Pupillomotor                             | 0.4 (0.7)   | 0.5 (0.7)   | 0.6 (0.8)   | 0.532     | -               | 0.320     |
| Skin                                     | 0.8 (1.1)   | 0.9 (1.0)   | 0.9 (1.1)   | 0.727     | -               | 0.312     |
| Sexual                                   | 5.0 (6.8)   | 4.3 (6.0)   | 5.8 (6.7)   | 0.274     | -               | 0.559     |
| Total (sum all)                          | 13.9 (8.8)  | 14.4 (9.2)  | 19.4 (11.1) | 0.001***  | III vs. rest    | <0.001*** |
| Cognitive function, mean (SD)            |             |             |             |           |                 |           |
| MoCA-visuospatial                        | 4.5 (0.8)   | 4.3 (0.8)   | 3.7 (1.5)   | <0.001*** | III vs. rest    | <0.001*** |
| MoCA-naming                              | 2.9 (0.2)   | 2.9 (0.3)   | 2.9 (0.4)   | 0.244     | -               | 0.363     |
| MoCA-attention                           | 5.8 (0.5)   | 5.6 (0.7)   | 5.3 (1.0)   | <0.001*** | III vs. rest    | <0.001*** |
| MoCA-language                            | 2.6 (0.5)   | 2.4 (0.8)   | 2.0 (1.0)   | <0.001*** | All comparisons | <0.001*** |
| MoCA-delayed recall                      | 3.7 (1.5)   | 3.0 (1.7)   | 2.0 (1.9)   | <0.001*** | All comparisons | <0.001*** |
| MoCA total score                         | 27.7 (2.4)  | 26.2 (2.7)  | 23.6 (4.4)  | <0.001*** | All comparisons | <0.001*** |
| Benton judgment of line orientation      | 13.3 (1.8)  | 12.8 (2.1)  | 11.4 (3.1)  | <0.001*** | III vs. rest    | <0.001*** |
| HVLT-total recall                        | 25.6 (4.7)  | 23.5 (5.3)  | 19.7 (6.1)  | <0.001*** | All comparisons | <0.001*** |
| HVLT-delayed recall                      | 8.9 (2.5)   | 8.3 (2.9)   | 6.1 (3.4)   | <0.001*** | III vs. rest    | <0.001*** |
| HVLT-discrimination recognition          | 11.0 (2.3)  | 10.7 (2.2)  | 9.7 (3.1)   | 0.005**   | III vs. rest    | 0.047     |
| HVLT-retention                           | 0.9 (0.2)   | 0.9 (0.2)   | 0.7 (0.3)   | <0.001*** | III vs. rest    | 0.010*    |
| LNS                                      | 11.2 (2.6)  | 10.2 (2.5)  | 8.4 (3.4)   | <0.001*** | All comparisons | <0.001*** |
| Semantic fluency                         | 53.7 (13.4) | 48.3 (11.9) | 39.4 (11.2) | <0.001*** | All comparisons | <0.001*** |
| Symbol digit test                        | 48 (9.6)    | 43.9 (9.7)  | 38.0 (10.8) | <0.001*** | All comparisons | <0.001*** |
| Cognitive phenotype, missing = 7, N (%)  |             |             |             |           |                 |           |
| Normal                                   | 133 (96.4)  | 193 (93.2)  | 39 (72.2)   | <0.001*** | -               | -         |
| MCI                                      | 4 (2.8)     | 9 (4.4)     | 9 (16.7)    |           |                 |           |
| Dementia                                 | 1 (0.7)     | 5 (2.4)     | 6 (11.1)    |           |                 |           |

<sup>a</sup> P-values were calculated using ANOVA (for continuous variables) and  $\chi^2$  test (for categorical variables) where appropriate.

<sup>b</sup> Post-hoc analysis was performed using the Tukey HSD test when the ANOVA P-value < 0.05.

<sup>c</sup> ANCOVA was used to calculate p-values (for continuous variables) adjusting for age and sex.

Multiple correction was conducted by controlling false discovery rate (FDR). \* FDR adjusted P-value < 0.05; \*\* FDR adjusted P-value < 0.01; \*\*\* FDR adjusted P-value < 0.001.

HVLT = Hopkins Verbal Learning Test; MCI = mild cognitive impairment; MDS-UPDRS = Movement Disorders Society–revised Unified Parkinson’s Disease Rating Scale; MoCA = Montreal Cognitive Assessment; PIGD = postural instability and gait disorder; PPMI = the Parkinson’s Progression Markers Initiative; SCOPA = Scales for Outcomes in Parkinson’s Disease.

**Supplementary Table 4. 5-year follow-up clinical characteristics by subtypes in the PPMI cohort**

| Variables                                   | Subtype PD-I<br>(Inching Pace) | Subtype PD-M<br>(Moderate Pace) | Subtype PD-R<br>(Rapid Pace) | P-value <sup>a</sup> | Post-hoc <sup>b</sup> | P-value<br>adjusted <sup>c</sup> |
|---------------------------------------------|--------------------------------|---------------------------------|------------------------------|----------------------|-----------------------|----------------------------------|
| # of participants                           | 145                            | 207                             | 54                           | -                    | -                     | -                                |
| <b><i>Motor manifestations</i></b>          |                                |                                 |                              |                      |                       |                                  |
| MDS-UPDRS Part II, mean (SD)                | 5.7 (4.3)                      | 11.1 (5.6)                      | 16.5 (10.0)                  | <0.001***            | All comparisons       | <0.001***                        |
| MDS-UPDRS Part III, mean (SD)               | 23.0 (9.5)                     | 32.5 (12.9)                     | 38.9 (15.8)                  | <0.001***            | All comparisons       | <0.001***                        |
| H&Y Stage, mean (SD)                        | 1.9 (0.4)                      | 2.0 (0.4)                       | 2.5 (0.9)                    | <0.001***            | III vs. rest          | <0.001***                        |
| Schwab and England score, mean (SD)         | 90.5 (6.6)                     | 84.1 (9.3)                      | 70.9 (23.6)                  | <0.001***            | All comparisons       | <0.001***                        |
| Tremor score, mean (SD)                     | 0.5 (0.4)                      | 0.7 (0.5)                       | 0.6 (0.5)                    | <0.001**             | I vs. II              | 0.003**                          |
| PIGD score, mean (SD)                       | 0.3 (0.3)                      | 0.5 (0.4)                       | 1.2 (1.0)                    | <0.001***            | All comparisons       | <0.001***                        |
| Motor phenotype, N (%)                      |                                |                                 |                              |                      |                       |                                  |
| Tremor                                      | 54 (37.2)                      | 102 (49.3)                      | 8 (14.8)                     | 0.004**              | -                     | -                                |
| Indeterminate                               | 24 (16.6)                      | 49 (23.7)                       | 6 (11.1)                     |                      |                       |                                  |
| PIGD                                        | 21 (14.5)                      | 56 (27.1)                       | 20 (37.0)                    |                      |                       |                                  |
| <b><i>Non-motor manifestations</i></b>      |                                |                                 |                              |                      |                       |                                  |
| MDS-UPDRS Part I, mean (SD)                 | 6.5 (4.7)                      | 9.8 (5.6)                       | 14.3 (9.0)                   | <0.001***            | All comparisons       | <0.001***                        |
| Hallucination, mean (SD)                    | 0.1 (0.3)                      | 0.2 (0.4)                       | 0.4 (1.1)                    | 0.002**              | III vs. rest          | 0.005**                          |
| Apathy, mean (SD)                           | 0.2 (0.5)                      | 0.5 (0.8)                       | 0.9 (1.2)                    | <0.001***            | All comparisons       | <0.001***                        |
| Pain, mean (SD)                             | 0.6 (0.9)                      | 1.0 (1.1)                       | 1.4 (1.1)                    | 0.002**              | I vs. rest            | <0.001***                        |
| Fatigue, mean (SD)                          | 0.7 (0.8)                      | 1.1 (1.0)                       | 1.6 (1.2)                    | <0.001***            | All comparisons       | <0.001***                        |
| Sleep, mean (SD)                            |                                |                                 |                              |                      |                       |                                  |
| Epworth sleepiness score                    | 5.4 (3.9)                      | 8.5 (4.4)                       | 10.2 (5.7)                   | <0.001***            | I vs. rest            | <0.001***                        |
| REM sleep behavior disorder                 | 3.7 (2.9)                      | 5.3 (3.1)                       | 5.7 (3.6)                    | <0.001***            | I vs. rest            | <0.001**                         |
| Sleep phenotype, missing = 1, N (%)         |                                |                                 |                              |                      |                       |                                  |
| REM sleep behavior disorder positive        | 51 (35.2)                      | 117 (56.8)                      | 30 (55.6)                    | <0.001***            | -                     | -                                |
| REM sleep behavior disorder negative        | 94 (64.8)                      | 89 (43.2)                       | 24 (44.4)                    |                      |                       |                                  |
| QUIP (Impulse control disorders), mean (SD) | 0.3 (0.7)                      | 0.5 (0.9)                       | 0.2 (0.4)                    | 0.028*               |                       | 0.054                            |
| Geriatric depression scale, mean (SD)       | 1.6 (1.9)                      | 3.0 (2.6)                       | 4.9 (4.2)                    | <0.001***            | All comparisons       | <0.001***                        |
| Depression phenotype, missing = 1, N (%)    |                                |                                 |                              |                      |                       |                                  |
| Normal                                      | 126 (86.9)                     | 160 (77.7)                      | 30 (55.6)                    | <0.001***            | -                     | -                                |
| Mild                                        | 13 (9.0)                       | 30 (14.6)                       | 10 (18.5)                    |                      |                       |                                  |
| Moderate                                    | 2 (1.4)                        | 15 (7.3)                        | 11 (20.4)                    |                      |                       |                                  |
| Severe                                      | 4 (2.7)                        | 1 (0.5)                         | 3 (5.6)                      |                      |                       |                                  |

|                                                                                                                                                                                                                                                                                                                                                                                                                                                                                                                                                                                                                     |             |             |             |           |                 |           |
|---------------------------------------------------------------------------------------------------------------------------------------------------------------------------------------------------------------------------------------------------------------------------------------------------------------------------------------------------------------------------------------------------------------------------------------------------------------------------------------------------------------------------------------------------------------------------------------------------------------------|-------------|-------------|-------------|-----------|-----------------|-----------|
| State trait anxiety index, mean (SD)                                                                                                                                                                                                                                                                                                                                                                                                                                                                                                                                                                                |             |             |             |           |                 |           |
| State subscore                                                                                                                                                                                                                                                                                                                                                                                                                                                                                                                                                                                                      | 28.8 (8.9)  | 33.0 (9.5)  | 36.1 (13.4) | <0.001*** | I vs. rest      | <0.001*** |
| Trait subscore                                                                                                                                                                                                                                                                                                                                                                                                                                                                                                                                                                                                      | 29.5 (9.2)  | 33.7 (9.7)  | 36.8 (13.5) | <0.001*** | I vs. rest      | <0.001*** |
| SCOPA autonomic questionnaire, mean (SD)                                                                                                                                                                                                                                                                                                                                                                                                                                                                                                                                                                            |             |             |             |           |                 |           |
| Gastrointestinal (up+down)                                                                                                                                                                                                                                                                                                                                                                                                                                                                                                                                                                                          | 2.7 (2.2)   | 3.8 (2.5)   | 5.1 (3.7)   | <0.001*** | All comparisons | <0.001*** |
| Urinary                                                                                                                                                                                                                                                                                                                                                                                                                                                                                                                                                                                                             | 4.4 (2.7)   | 5.8 (5.3)   | 6.7 (4.8)   | 0.017*    | I vs. rest      | 0.111     |
| Cardiovascular                                                                                                                                                                                                                                                                                                                                                                                                                                                                                                                                                                                                      | 0.5 (0.9)   | 0.8 (1.2)   | 1.4 (1.8)   | 0.001**   | III vs. rest    | 0.002**   |
| Thermoregulatory                                                                                                                                                                                                                                                                                                                                                                                                                                                                                                                                                                                                    | 0.5 (1.1)   | 0.8 (1.2)   | 0.4 (0.7)   | 0.054     | -               | 0.032*    |
| Pupillomotor                                                                                                                                                                                                                                                                                                                                                                                                                                                                                                                                                                                                        | 0.4 (0.7)   | 0.6 (0.8)   | 0.8 (1.0)   | 0.048     | -               | 0.062     |
| Skin                                                                                                                                                                                                                                                                                                                                                                                                                                                                                                                                                                                                                | 0.7 (1.0)   | 1.2 (1.2)   | 1.5 (1.9)   | <0.001*** | I vs. rest      | <0.001*** |
| Sexual                                                                                                                                                                                                                                                                                                                                                                                                                                                                                                                                                                                                              | 4.5 (6.3)   | 5.2 (6.4)   | 6.7 (7.4)   | 0.248     | -               | 0.085     |
| Total (sum all)                                                                                                                                                                                                                                                                                                                                                                                                                                                                                                                                                                                                     | 13.7 (8.7)  | 18.3 (11.1) | 22.5 (15.2) | <0.001*** | I vs. rest      | <0.001*** |
| Cognitive function, mean (SD)                                                                                                                                                                                                                                                                                                                                                                                                                                                                                                                                                                                       |             |             |             |           |                 |           |
| MoCA-visuospatial                                                                                                                                                                                                                                                                                                                                                                                                                                                                                                                                                                                                   | 4.6 (0.7)   | 4.2 (1.1)   | 3.6 (1.6)   | <0.001*** | All comparisons | <0.001*** |
| MoCA-naming                                                                                                                                                                                                                                                                                                                                                                                                                                                                                                                                                                                                         | 3 (0.2)     | 2.9 (0.2)   | 2.8 (0.6)   | 0.041     | III vs. rest    | 0.054     |
| MoCA-attention                                                                                                                                                                                                                                                                                                                                                                                                                                                                                                                                                                                                      | 5.7 (0.5)   | 5.5 (0.8)   | 4.8 (1.4)   | <0.001*** | III vs. rest    | <0.001*** |
| MoCA-language                                                                                                                                                                                                                                                                                                                                                                                                                                                                                                                                                                                                       | 2.6 (0.6)   | 2.5 (0.7)   | 2.2 (0.9)   | 0.013*    | I vs. III       | 0.028*    |
| MoCA-delayed recall                                                                                                                                                                                                                                                                                                                                                                                                                                                                                                                                                                                                 | 4.3 (1.1)   | 3.3 (1.6)   | 1.9 (1.8)   | <0.001*** | All comparisons | <0.001*** |
| MoCA total score                                                                                                                                                                                                                                                                                                                                                                                                                                                                                                                                                                                                    | 28.3 (1.7)  | 26.5 (3.2)  | 23.0 (5.5)  | <0.001*** | All comparisons | <0.001*** |
| Benton judgment of line orientation                                                                                                                                                                                                                                                                                                                                                                                                                                                                                                                                                                                 | 13.0 (2)    | 12.3 (2.2)  | 11.0 (2.8)  | <0.001*** | All comparisons | <0.001*** |
| HVLT-total recall                                                                                                                                                                                                                                                                                                                                                                                                                                                                                                                                                                                                   | 27.6 (5.1)  | 24.1 (6.3)  | 17.2 (4.9)  | <0.001*** | All comparisons | <0.001*** |
| HVLT-delayed recall                                                                                                                                                                                                                                                                                                                                                                                                                                                                                                                                                                                                 | 10 (2.4)    | 8.4 (3.1)   | 4.9 (3.1)   | <0.001*** | All comparisons | <0.001*** |
| HVLT-discrimination recognition                                                                                                                                                                                                                                                                                                                                                                                                                                                                                                                                                                                     | 11.3 (1.1)  | 10.5 (2.0)  | 8.9 (2.5)   | <0.001*** | All comparisons | <0.001*** |
| HVLT-retention                                                                                                                                                                                                                                                                                                                                                                                                                                                                                                                                                                                                      | 0.9 (0.2)   | 0.9 (0.2)   | 0.7 (0.4)   | <0.001*** | All comparisons | <0.001*** |
| LNS                                                                                                                                                                                                                                                                                                                                                                                                                                                                                                                                                                                                                 | 11.5 (2.6)  | 9.7 (2.8)   | 8.0 (3.4)   | <0.001*** | All comparisons | <0.001*** |
| Semantic fluency                                                                                                                                                                                                                                                                                                                                                                                                                                                                                                                                                                                                    | 55.6 (12.4) | 47.1 (11.5) | 35.3 (13.4) | <0.001*** | All comparisons | <0.001*** |
| Symbol digit test                                                                                                                                                                                                                                                                                                                                                                                                                                                                                                                                                                                                   | 50.4 (10.7) | 44.1 (10.7) | 39.4 (15.3) | <0.001*** | I vs. rest      | <0.001*** |
| Cognitive phenotype, missing = 7, N (%)                                                                                                                                                                                                                                                                                                                                                                                                                                                                                                                                                                             |             |             |             |           |                 |           |
| Normal                                                                                                                                                                                                                                                                                                                                                                                                                                                                                                                                                                                                              | 134 (97.1)  | 185 (89.4)  | 31 (51.4)   | <0.001*** | -               | -         |
| MCI                                                                                                                                                                                                                                                                                                                                                                                                                                                                                                                                                                                                                 | 3 (2.2)     | 16 (7.7)    | 8 (14.8)    |           |                 |           |
| Dementia                                                                                                                                                                                                                                                                                                                                                                                                                                                                                                                                                                                                            | 1 (0.7)     | 6 (2.9)     | 15 (27.8)   |           |                 |           |
| <p><sup>a</sup> P-values were calculated using ANOVA (for continuous variables) and <math>\chi^2</math> test (for categorical variables) where appropriate.</p> <p><sup>b</sup> Post-hoc analysis was performed using the Tukey HSD test when the ANOVA P-value &lt; 0.05.</p> <p><sup>c</sup> ANCOVA was used to calculate p-values (for continuous variables) adjusting for age, sex, and levodopa equivalent daily dose.</p> <p>Multiple correction was conducted by controlling false discovery rate (FDR). * FDR adjusted P-value&lt; 0.05; ** FDR adjusted P-value&lt; 0.01; *** FDR adjusted P-value&lt;</p> |             |             |             |           |                 |           |

0.001.

HVLT = Hopkins Verbal Learning Test; MCI = mild cognitive impairment; MDS-UPDRS = Movement Disorders Society–revised Unified Parkinson’s Disease Rating Scale; MoCA = Montreal Cognitive Assessment; PIGD = postural instability and gait disorder; PPMI = the Parkinson’s Progression Markers Initiative; SCOPA = Scales for Outcomes in Parkinson’s Disease.

**Supplementary Table 5. Demographics and baseline clinical characteristics by subtypes in the PDBP cohort**

| Variables                           | Subtype PD-I<br>(Inching Pace) | Subtype PD-M<br>(Moderate Pace) | Subtype PD-R<br>(Rapid Pace) | P-value <sup>a</sup> | Post-hoc <sup>b</sup> | P-value<br>adjusted <sup>c</sup> |
|-------------------------------------|--------------------------------|---------------------------------|------------------------------|----------------------|-----------------------|----------------------------------|
| <b># of participants</b>            | <b>55</b>                      | <b>72</b>                       | <b>49</b>                    | -                    | -                     | -                                |
| Age at onset, year, mean (SD)       | 58.6 (9.8)                     | 64.8 (9.3)                      | 65.2 (9.8)                   | <0.001               | I vs. rest            | -                                |
| Sex male, N (%)                     | 28 (50.9)                      | 43 (59.7)                       | 32 (65.3)                    | 0.335                | -                     | -                                |
| Race white, N (%)                   | 54 (98.2)                      | 66 (91.7)                       | 47 (95.9)                    | 0.232                | -                     | -                                |
| Symptom duration, year, mean (SD)   | 0.9 (0.8)                      | 0.8 (0.7)                       | 1.1 (0.8)                    | 0.183                | -                     | -                                |
| Family history, N (%)               | 7 (12.7)                       | 10 (13.4)                       | 8 (16.3)                     | 0.896                | -                     | -                                |
| Education history, N (%)            |                                |                                 |                              |                      |                       |                                  |
| Less than 12 years                  | -                              | 2 (2.8)                         | 1 (2.0)                      | 0.257                | -                     | -                                |
| 12-16 years                         | 32 (58.2)                      | 50 (69.4)                       | 27 (55.1)                    |                      |                       |                                  |
| Greater than 16 years               | 23 (41.8)                      | 20 (27.8)                       | 20 (40.8)                    |                      |                       |                                  |
| <b>Motor manifestations</b>         |                                |                                 |                              |                      |                       |                                  |
| MDS-UPDRS Part II, mean (SD)        | 3.9 (2.9)                      | 5.6 (4.7)                       | 9.5 (6.0)                    | <0.001***            | III vs. rest          | <0.001***                        |
| MDS-UPDRS Part III, mean (SD)       | 14.9 (8.9)                     | 18.1 (8.9)                      | 24.4 (10.4)                  | <0.001***            | III vs. rest          | 0.012*                           |
| H&Y Stage, mean (SD)                | 1.7 (0.5)                      | 1.8 (0.5)                       | 2.1 (0.5)                    | <0.001***            | III vs. rest          | <0.001***                        |
| Schwab and England score, mean (SD) | 94.4 (5.0)                     | 91.9 (7.8)                      | 88.2 (6.7)                   | <0.001***            | III vs. rest          | <0.001***                        |
| Tremor score, mean (SD)             | 0.4 (0.4)                      | 0.5 (0.4)                       | 0.4 (0.3)                    | 0.169                | -                     | 0.186                            |
| PIGD score, mean (SD)               | 0.2 (0.2)                      | 0.3 (0.2)                       | 0.6 (0.5)                    | <0.001***            | III vs. rest          | <0.001***                        |
| Motor phenotype, N (%)              |                                |                                 |                              |                      |                       |                                  |
| Tremor                              | 37 (67.3)                      | 48 (66.7)                       | 18 (36.7)                    | 0.002**              | III vs. rest          | -                                |
| Indeterminate                       | 4 (7.2)                        | 8 (11.1)                        | 4 (8.2)                      |                      |                       |                                  |
| PIGD                                | 14 (25.5)                      | 16 (22.2)                       | 27 (55.1)                    |                      |                       |                                  |
| <b>Non-motor manifestations</b>     |                                |                                 |                              |                      |                       |                                  |
| MDS-UPDRS Part I, mean (SD)         | 4.7 (3.3)                      | 6.2 (4.4)                       | 9.1 (5.0)                    | <0.001***            | III vs. rest          | <0.001***                        |
| Hallucination, mean (SD)            | 0.02 (0.12)                    | 0.03 (0.17)                     | 0.14 (0.35)                  | 0.009*               | III vs. rest          | 0.010*                           |
| Apathy, mean (SD)                   | 0.2 (0.4)                      | 0.2 (0.5)                       | 0.4 (0.8)                    | 0.201                | -                     | 0.170                            |
| Pain, mean (SD)                     | 0.8 (0.9)                      | 0.7 (0.7)                       | 1.0 (1.1)                    | 0.116                | -                     | 0.076                            |
| Fatigue, mean (SD)                  | 0.7 (0.6)                      | 0.8 (0.8)                       | 1.1 (0.9)                    | 0.039                | I vs. III             | 0.037                            |
| Sleep, mean (SD)                    |                                |                                 |                              |                      |                       |                                  |
| Epworth sleepiness score            | 5.1 (3.2)                      | 5.4 (3.2)                       | 8.3 (5.1)                    | <0.001***            | I vs. III             | <0.001***                        |
| REM sleep behavior disorder         | 0.1 (0.8)                      | 0.08 (0.4)                      | 0.1 (0.7)                    | 0.885                | -                     | 0.817                            |
| Cognitive function, mean (SD)       |                                |                                 |                              |                      |                       |                                  |
| MoCA-language                       | 2.5 (0.8)                      | 2.4 (0.7)                       | 2.3 (0.8)                    | 0.401                | -                     | 0.575                            |

|                                                                                                                                                                                                                                                                                                                                                                                                                                                                                                                                                                                                                                                                                                                                                                                                                                    |            |            |            |       |   |       |
|------------------------------------------------------------------------------------------------------------------------------------------------------------------------------------------------------------------------------------------------------------------------------------------------------------------------------------------------------------------------------------------------------------------------------------------------------------------------------------------------------------------------------------------------------------------------------------------------------------------------------------------------------------------------------------------------------------------------------------------------------------------------------------------------------------------------------------|------------|------------|------------|-------|---|-------|
| MoCA total score                                                                                                                                                                                                                                                                                                                                                                                                                                                                                                                                                                                                                                                                                                                                                                                                                   | 27.1 (2.2) | 26.2 (2.4) | 26.2 (2.5) | 0.050 | - | 0.361 |
| <p><sup>a</sup> P-values were calculated using ANOVA (for continuous variables) and <math>\chi^2</math> test (for categorical variables) where appropriate.</p> <p><sup>b</sup> Post-hoc analysis was performed using the Tukey HSD test when the ANOVA P-value &lt; 0.05.</p> <p><sup>c</sup> ANCOVA was used to calculate p-values (for continuous variables) adjusting for age and sex.</p> <p>Multiple correction was conducted by controlling false discovery rate (FDR). * FDR adjusted P-value &lt; 0.05; ** FDR adjusted P-value &lt; 0.01; *** FDR adjusted P-value &lt; 0.001.</p> <p>MDS-UPDRS = Movement Disorders Society–revised Unified Parkinson’s Disease Rating Scale; MoCA = Montreal Cognitive Assessment; PDBP = the Parkinson Disease Biomarkers Program; PIGD = postural instability and gait disorder.</p> |            |            |            |       |   |       |



**Supplementary Table 6. 2-year follow-up clinical characteristics by subtypes in the PDBP cohort**

| Variables                           | Subtype PD-I<br>(Inching Pace) | Subtype PD-M<br>(Moderate Pace) | Subtype PD-R<br>(Rapid Pace) | P-value <sup>a</sup> | Post-hoc <sup>b</sup> | P-value<br>adjusted <sup>c</sup> |
|-------------------------------------|--------------------------------|---------------------------------|------------------------------|----------------------|-----------------------|----------------------------------|
| # of participants                   | 55                             | 72                              | 49                           | -                    | -                     | -                                |
| <b>Motor manifestations</b>         |                                |                                 |                              |                      |                       |                                  |
| MDS-UPDRS Part II, mean (SD)        | 4.2 (3.6)                      | 6.5 (4.4)                       | 14.6 (8.5)                   | <0.001***            | III vs. rest          | <0.001***                        |
| MDS-UPDRS Part III, mean (SD)       | 13.5 (5.8)                     | 17.1 (7.8)                      | 27.3 (12.4)                  | <0.001***            | III vs. rest          | <0.001***                        |
| H&Y Stage, mean (SD)                | 1.9 (0.4)                      | 1.9 (0.3)                       | 2.0 (0.7)                    | 0.572                | -                     | 0.708                            |
| Schwab and England score, mean (SD) | 93.3 (6)                       | 92.2 (11.7)                     | 81.2 (17.7)                  | <0.001***            | III vs. rest          | <0.001***                        |
| Tremor score, mean (SD)             | 0.4 (0.3)                      | 0.5 (0.3)                       | 0.5 (0.3)                    | 0.095                | -                     | 0.123                            |
| PIGD score, mean (SD)               | 0.1 (0.2)                      | 0.2 (0.2)                       | 0.6 (0.7)                    | <0.001***            | III vs. rest          | <0.001***                        |
| Motor phenotype, N (%)              |                                |                                 |                              |                      |                       |                                  |
| Tremor                              | 27 (49.1)                      | 52 (72.2)                       | 21 (42.9)                    | 0.005**              | -                     | -                                |
| Indeterminate                       | 10 (18.2)                      | 2 (2.8)                         | 2 (4.1)                      |                      |                       |                                  |
| PIGD                                | 8 (14.6)                       | 6 (8.3)                         | 19 (38.8)                    |                      |                       |                                  |
| <b>Non-motor manifestations</b>     |                                |                                 |                              |                      |                       |                                  |
| MDS-UPDRS Part I, mean (SD)         | 4.9 (3.8)                      | 7.7 (5.3)                       | 11.4 (6.3)                   | <0.001***            | All comparisons       | <0.001***                        |
| Hallucination, mean (SD)            | 0.04 (0.21)                    | 0.03 (0.18)                     | 0.24 (0.73)                  | 0.036*               | II vs. III            | 0.022*                           |
| Apathy, mean (SD)                   | 0.1 (0.3)                      | 0.1 (0.4)                       | 0.4 (0.7)                    | 0.002**              | III vs. rest          | 0.002**                          |
| Pain, mean (SD)                     | 0.6 (0.7)                      | 0.8 (0.9)                       | 1.3 (1.2)                    | 0.005**              | I vs. III             | 0.002**                          |
| Fatigue, mean (SD)                  | 0.6 (0.8)                      | 1.1 (1.1)                       | 1.2 (1.0)                    | 0.015*               | I vs. II              | 0.004**                          |
| Sleep, mean (SD)                    |                                |                                 |                              |                      |                       |                                  |
| Epworth sleepiness score            | 5.2(3.4)                       | 5.6 (4.4)                       | 10.1 (4.3)                   | <0.001***            | III vs. rest          | <0.001***                        |
| REM sleep behavior disorder         | 0.1 (0.9)                      | 0.05 (0.3)                      | 0.2 (0.8)                    | 0.656                | -                     | 0.642                            |
| Cognitive function, mean (SD)       |                                |                                 |                              |                      |                       |                                  |
| MoCA-language                       | 2.5 (0.7)                      | 2.4 (0.8)                       | 2.1 (0.9)                    | 0.053                | -                     | 0.097                            |
| MoCA total score                    | 27.6 (2.1)                     | 26.1 (2.8)                      | 24.5 (5.4)                   | <0.001***            | I vs. III             | 0.014*                           |

<sup>a</sup> P-values were calculated using ANOVA (for continuous variables) and  $\chi^2$  test (for categorical variables) where appropriate.

<sup>b</sup> Post-hoc analysis was performed using the Tukey HSD test when the ANOVA P-value < 0.05.

<sup>c</sup> ANCOVA was used to calculate p-values (for continuous variables) adjusting for age and sex.

Multiple correction was conducted by controlling false discovery rate (FDR). \* FDR adjusted P-value < 0.05; \*\* FDR adjusted P-value < 0.01; \*\*\* FDR adjusted P-value < 0.001.

MDS-UPDRS = Movement Disorders Society–revised Unified Parkinson’s Disease Rating Scale; MoCA = Montreal Cognitive Assessment; PIGD = postural instability and

gait disorder.

**Supplementary Table 7. 4-year follow-up clinical characteristics by subtypes in the PDBP cohort**

| Variables                           | Subtype PD-I<br>(Inching Pace) | Subtype PD-M<br>(Moderate Pace) | Subtype PD-R<br>(Rapid Pace) | P-value <sup>a</sup> | Post-hoc <sup>b</sup> | P-value<br>adjusted <sup>c</sup> |
|-------------------------------------|--------------------------------|---------------------------------|------------------------------|----------------------|-----------------------|----------------------------------|
| # of participants                   | 55                             | 72                              | 49                           | -                    | -                     | -                                |
| <b>Motor manifestations</b>         |                                |                                 |                              |                      |                       |                                  |
| MDS-UPDRS Part II, mean (SD)        | 2.7 (1.7)                      | 8 (4.0)                         | 16.2 (6.6)                   | <0.001***            | All comparisons       | <0.001***                        |
| MDS-UPDRS Part III, mean (SD)       | 17.9 (7.8)                     | 21.8 (5.8)                      | 31.7 (9.9)                   | 0.002**              | III vs. rest          | 0.003**                          |
| H&Y Stage, mean (SD)                | 2.0 (0.0)                      | 2.0 (0.0)                       | 2.4 (0.7)                    | 0.022*               | III vs. rest          | 0.019*                           |
| Schwab and England score, mean (SD) | 95 (5.3)                       | 90.8 (4.9)                      | 76.7 (18.7)                  | 0.002**              | III vs. rest          | 0.003**                          |
| Tremor score, mean (SD)             | 0.4 (0.3)                      | 0.4 (0.4)                       | 0.5 (0.2)                    | 0.714                | -                     | 0.598                            |
| PIGD score, mean (SD)               | 0.1 (0.1)                      | 0.4 (0.3)                       | 1.1 (0.5)                    | <0.001***            | III vs. rest          | <0.001***                        |
| Motor phenotype, N (%)              |                                |                                 |                              |                      |                       |                                  |
| Tremor                              | 8 (14.6)                       | 5 (7.0)                         | 2 (4.1)                      | 0.056                | -                     | -                                |
| Indeterminate                       | 1 (1.9)                        | 4 (5.6)                         | 1 (2.0)                      |                      |                       |                                  |
| PIGD                                | 1 (1.9)                        | 4 (5.6)                         | 6 (12.2)                     |                      |                       |                                  |
| <b>Non-motor manifestations</b>     |                                |                                 |                              |                      |                       |                                  |
| MDS-UPDRS Part I, mean (SD)         | 4.2 (3.0)                      | 8.4 (2.9)                       | 13.6 (7.3)                   | <0.001***            | III vs. rest          | <0.001***                        |
| Hallucination, mean (SD)            | -                              | -                               | 0.6 (0.7)                    | -                    | -                     | -                                |
| Apathy, mean (SD)                   | 0.2 (0.4)                      | 0.1 (0.3)                       | 0.3 (0.5)                    | 0.337                | -                     | 0.288                            |
| Pain, mean (SD)                     | 0.5 (0.5)                      | 1.4 (1.3)                       | 1.6 (1.1)                    | 0.070                | -                     | 0.09                             |
| Fatigue, mean (SD)                  | 0.6 (0.7)                      | 1.1 (1.0)                       | 1.2 (1.0)                    | 0.282                | -                     | 0.292                            |
| Sleep, mean (SD)                    |                                |                                 |                              |                      |                       |                                  |
| Epworth sleepiness score            | 4.4 (2.2)                      | 5.8 (3.1)                       | 9.9 (3.5)                    | 0.001**              | III vs. rest          | <0.001***                        |
| REM sleep behavior disorder         | -                              | -                               | -                            | -                    | -                     | -                                |
| Cognitive function, mean (SD)       |                                |                                 |                              |                      |                       |                                  |
| MoCA-language                       | 2.8 (0.4)                      | 2.5 (0.9)                       | 2.1 (1.1)                    | 0.209                | -                     | 0.309                            |
| MoCA total score                    | 28.2 (1.9)                     | 24.4 (4.4)                      | 24.9 (3.6)                   | 0.039                | I vs. II              | 0.096                            |

<sup>a</sup> P-values were calculated using ANOVA (for continuous variables) and  $\chi^2$  test (for categorical variables) where appropriate.

<sup>b</sup> Post-hoc analysis was performed using the Tukey HSD test when the ANOVA P-value < 0.05.

<sup>c</sup> ANCOVA was used to calculate p-values (for continuous variables) adjusting for age and sex.

Multiple correction was conducted by controlling false discovery rate (FDR). \* FDR adjusted P-value < 0.05; \*\* FDR adjusted P-value < 0.01; \*\*\* FDR adjusted P-value < 0.001.

MDS-UPDRS = Movement Disorders Society-revised Unified Parkinson's Disease Rating Scale; MoCA = Montreal Cognitive Assessment; PIGD = postural instability and

gait disorder.

**Supplementary Table 8. Annual progression rates in clinical manifestations and CSF biomarkers by subtypes assessed by linear mixed effects models in the PDB cohort**

| Variable                                 | Subtype PD-I<br>(Inching Pace) |         | Subtype PD-M<br>(Moderate Pace) |           | Subtype PD-R<br>(Rapid Pace) |           |
|------------------------------------------|--------------------------------|---------|---------------------------------|-----------|------------------------------|-----------|
|                                          | $\beta$                        | P value | $\beta$                         | P value   | $\beta$                      | P value   |
| <b>Motor manifestations</b>              |                                |         |                                 |           |                              |           |
| MDS-UPDRS Part II                        | 0.10 (-0.20, 0.40)             | 0.530   | 1.01 (0.67, 1.36)               | <0.001*** | 2.53 (1.40, 3.67)            | <0.001*** |
| MDS-UPDRS Part III                       | -0.30 (-1.07, 0.47)            | 0.444   | 1.12 (0.46, 1.78)               | 0.002**   | 2.70 (1.70, 3.70)            | <0.001*** |
| H&Y Stage                                | 0.04 (-0.00, 0.08)             | 0.078   | 0.05 (0.02, 0.08)               | 0.007*    | 0.10 (0.01, 0.19)            | 0.042     |
| Schwab and England score                 | -0.48 (-1.10, 0.11)            | 0.117   | -0.28 (-1.10, 0.53)             | 0.505     | -4.05 (-5.92, -2.18)         | <0.001*** |
| Tremor score                             | -0.01 (-0.03, 0.02)            | 0.706   | 0.01 (-0.02, 0.03)              | 0.465     | 0.03 (-0.00, 0.06)           | 0.095     |
| PIGD score                               | -0.03 (-0.04, -0.01)           | <0.001* | 0.02 (-0.00, 0.041)             | 0.110     | 0.14 (0.06, 0.22)            | 0.001**   |
| <b>Non-motor manifestations</b>          |                                |         |                                 |           |                              |           |
| MDS-UPDRS Part I                         | 0.11 (-0.10, 0.32)             | 0.333   | 0.85 (0.53, 1.16)               | <0.001*** | 1.36 (0.91, 1.82)            | <0.001*** |
| Hallucination                            | 0.01 (-0.01, 0.03)             | 0.422   | 0.01 (-0.01, 0.02)              | 0.377     | 0.06 (0.01, 0.12)            | 0.031*    |
| Apathy                                   | -0.00 (-0.05, 0.04)            | 0.853   | 0.04 (-0.01, 0.09)              | 0.162     | 0.05 (-0.02, 0.13)           | 0.187     |
| Pain                                     | -0.03 (-0.09, 0.04)            | 0.453   | 0.13 (0.07, 0.20)               | <0.001*** | 0.14 (0.03, 0.24)            | 0.013*    |
| Fatigue                                  | -0.02 (-0.08, 0.03)            | 0.440   | 0.09 (0.02, 0.16)               | 0.023     | 0.13 (0.06, 0.20)            | 0.002**   |
| <b>Sleep</b>                             |                                |         |                                 |           |                              |           |
| Epworth sleepiness score                 | 0.12 (-0.11, 0.34)             | 0.327   | 0.17 (-0.14, 0.47)              | 0.294     | 0.69 (0.23, 1.10)            | 0.005**   |
| REM sleep behavior disorder <sup>a</sup> | -                              | -       | -                               | -         | -                            | -         |
| <b>Cognitive function</b>                |                                |         |                                 |           |                              |           |
| MoCA-language                            | 0.03 (-0.05, 0.11)             | 0.469   | 0.01 (-0.07, 0.08)              | 0.845     | -0.16 (-0.26, -0.06)         | 0.005     |
| MoCA total score                         | 0.02 (-0.15, 0.18)             | 0.836   | -0.15 (-0.4, 0.09)              | 0.214     | -1.10 (-1.62, -0.57)         | <0.001*** |

<sup>a</sup> The values in REM sleep behavior disorders are so sparse that the corresponding beta is not available. Multiple correction was conducted by controlling false discovery rate (FDR). \* FDR adjusted P-value< 0.05; \*\* FDR adjusted P-value< 0.01; \*\*\* FDR adjusted P-value< 0.001.

MDS-UPDRS = Movement Disorders Society–revised Unified Parkinson’s Disease Rating Scale; MoCA = Montreal Cognitive Assessment; PDBP = the Parkinson Disease Biomarkers Program; PIGD = postural instability and gait disorder.

**Supplementary Table 9. Baseline CSF biomarkers by subtypes in the PPMI cohort**

| Biomarker                          | HC                 | PD-I, mean (SD)    | PD-M, mean (SD)    | PD-R, mean (SD)    | P values <sup>a</sup> |             |             |               |               |               |
|------------------------------------|--------------------|--------------------|--------------------|--------------------|-----------------------|-------------|-------------|---------------|---------------|---------------|
|                                    |                    |                    |                    |                    | HC vs. PD-I           | HC vs. PD-M | HC vs. PD-R | PD-M vs. PD-I | PD-R vs. PD-I | PD-R vs. PD-M |
| $\alpha$ -synuclein                | 1704.491 (752.640) | 1607.109 (734.891) | 1487.264 (659.634) | 1357.906 (505.550) | 0.020                 | 0.001       | 0.218       | 0.153         | 0.011         | 0.068         |
| A $\beta$ -42                      | 1025.042 (498.628) | 970.128 (463.830)  | 905.070 (386.737)  | 781.500 (351.559)  | 0.148                 | 0.398       | 0.912       | 0.227         | 0.009         | 0.045         |
| P-tau                              | 16.845 (8.412)     | 14.342 (5.403)     | 14.014 (5.107)     | 14.959 (6.352)     | 0.013                 | <0.001      | 0.023       | 0.571         | 0.767         | 0.760         |
| T-tau                              | 190.283 (79.901)   | 169.613 (59.369)   | 163.533 (53.990)   | 170.126 (66.713)   | 0.014                 | <0.001      | 0.017       | 0.319         | 0.437         | 0.933         |
| A $\beta$ -42/T-tau                | 5.578 (1.649)      | 5.713 (1.480)      | 5.635 (1.572)      | 4.906 (1.885)      | 0.479                 | <0.001      | 0.009       | 0.962         | 0.022         | 0.051         |
| A $\beta$ -42/ $\alpha$ -synuclein | 0.636 (0.221)      | 0.637 (0.219)      | 0.659 (0.282)      | 0.593 (0.208)      | 0.182                 | <0.001      | 0.218       | 0.311         | 0.340         | 0.402         |
| P-tau/ $\alpha$ -synuclein         | 0.010 (0.002)      | 0.009 (0.002)      | 0.010 (0.002)      | 0.011 (0.003)      | 0.821                 | 0.742       | 0.004       | 0.072         | 0.001         | 0.007         |
| P-tau/T-tau                        | 0.087 (0.007)      | 0.084 (0.008)      | 0.085 (0.007)      | 0.087 (0.008)      | 0.057                 | 0.228       | 0.140       | 0.215         | 0.114         | 0.145         |
| T-tau/ $\alpha$ -synuclein         | 0.116 (0.026)      | 0.113 (0.028)      | 0.117 (0.029)      | 0.128 (0.026)      | 0.664                 | 0.400       | 0.017       | 0.219         | 0.015         | 0.036         |
| A $\beta$ -42/P-tau                | 64.795 (20.617)    | 68.010 (17.636)    | 66.679 (20.169)    | 56.961 (22.692)    | 0.207                 | <0.001      | 0.006       | 0.841         | 0.010         | 0.037         |

<sup>a</sup>ANCOVA was used to calculate p-values adjusting for age and sex.

A $\beta$ -42 = the 42 amino acid form of amyloid- $\beta$ ; CSF = cerebrospinal fluid.

## Supplementary References

- 1 Goetz, C. G. *et al.* Movement Disorder Society-sponsored revision of the Unified Parkinson's Disease Rating Scale (MDS-UPDRS): Scale presentation and clinimetric testing results. *Movement Disorders* **23**, 2129-2170 (2008).
- 2 Visser, M., Marinus, J., Stiggelbout, A. M. & Van Hilten, J. J. Assessment of autonomic dysfunction in Parkinson's disease: The SCOPA-AUT. *Movement Disorders* **19**, 1306-1312 (2004).
- 3 Sheikh, J. I. & Yesavage, J. A. Geriatric Depression Scale (GDS): recent evidence and development of a shorter version. *Clinical Gerontologist: The Journal of Aging and Mental Health* (1986).
- 4 Weintraub, D. *et al.* Validation of the questionnaire for impulsive-compulsive disorders in Parkinson's disease. *Movement Disorders* **24**, 1461-1467 (2009).
- 5 Spielberger, C. D. State-Trait Anxiety Inventory. In *The Corsini Encyclopedia of Psychology* 1-1.
- 6 Benton, A. L., Varney, N. R. & Hamsher, K. d. Visuospatial Judgment: A Clinical Test. *Archives of Neurology* **35**, 364-367 (1978).
- 7 Shapiro, A. M., Benedict, R. H. B., Schretlen, D. & Brandt, J. Construct and Concurrent Validity of the Hopkins Verbal Learning Test – Revised. *The Clinical Neuropsychologist* **13**, 348-358 (1999).
- 8 Nasreddine, Z. S. *et al.* The Montreal Cognitive Assessment, MoCA: A Brief Screening Tool For Mild Cognitive Impairment. *Journal of the American Geriatrics Society* **53**, 695-699 (2005).
- 9 Gladsjo, J. A. *et al.* Norms for Letter and Category Fluency: Demographic Corrections for Age, Education, and Ethnicity. *Assessment* **6**, 147-178 (1999).
- 10 Smith, A. *Symbol digit modalities test*. (Western Psychological Services Los Angeles, 1973).
- 11 Johns, M. W. A New Method for Measuring Daytime Sleepiness: The Epworth Sleepiness Scale. *Sleep* **14**, 540-545 (1991).
- 12 Stiasny-Kolster, K. *et al.* The REM sleep behavior disorder screening questionnaire—A new diagnostic instrument. *Movement Disorders* **22**, 2386-2393 (2007).
